# Supplementary material for: Comparison of Vildagliptin and Pioglitazone in Korean Patients with Type 2 Diabetes Inadequately Controlled with Metformin
Source: PubMed Central journal article supplement — Diabetes Metab J. 2016 Apr 5;40(3):230–9. doi: 10.4093/dmj.2016.40.3.230 (PMC4929227; doi:10.4093/dmj.2016.40.3.230), 2016-04-05
Supplement: dmj-40-230-s001.pdf [file dmj-40-230-s001.pdf]

**Supplementary Table 1.** Status of medical management (safety population)

| Adverse event                                    | Vildagliptin 50 mg bid+metformin ( <i>n</i> = 117) | Pioglitazone 15 mg qd+metformin ( <i>n</i> = 111) |
|--------------------------------------------------|----------------------------------------------------|---------------------------------------------------|
| Dyslipidaemic agents                             | 60 (62.5)                                          | 63 (65.0)                                         |
| Antihypertensive agents                          | 74 (77.1)                                          | 70 (72.2)                                         |
| Angiotensin II antagonists                       | 22 (22.9)                                          | 30 (30.9)                                         |
| ACE inhibitors                                   | 12 (12.5)                                          | 6 (6.2)                                           |
| Calcium antagonists                              | 19 (19.8)                                          | 14 (14.4)                                         |
| Diuretics                                        | 7 (7.3)                                            | 7 (7.2)                                           |
| $\beta$ -Blockers                                | 4 (4.2)                                            | 6 (6.2)                                           |
| Other antihypertensives                          | 10 (10.4)                                          | 7 (7.2)                                           |
| Anticoagulants, antiplatelets, and fibrinolytics | 40 (41.7)                                          | 38 (39.2)                                         |
| Antacids, antireflux agents, and antiulcerants   | 29 (30.2)                                          | 23 (23.7)                                         |

Values are presented as number (%).

bid, twice daily; qd, once daily; ACE, angiotensin-converting-enzyme.
