# Supplementary material for: Comparison of Vildagliptin and Pioglitazone in Korean Patients with Type 2 Diabetes Inadequately Controlled with Metformin
Source: PubMed Central journal article supplement — Diabetes Metab J. 2016 Apr 5;40(3):230–9. doi: 10.4093/dmj.2016.40.3.230 (PMC4929227; doi:10.4093/dmj.2016.40.3.230), 2016-04-05
Supplement: dmj-40-230-s002.pdf [file dmj-40-230-s002.pdf]

**Supplementary Table 2.** Adverse events (safety population)

| Adverse event                      | Vildagliptin 50 mg bid+metformin (n=117) | Pioglitazone 15 mg qd+metformin (n=111) | P value |
|------------------------------------|------------------------------------------|-----------------------------------------|---------|
| Adverse event                      | 27 (23.1)                                | 25 (22.5)                               | 0.921   |
| Common adverse events <sup>a</sup> |                                          |                                         |         |
| Common cold                        | 3                                        | 4                                       |         |
| Upper respiration tract infection  | 4                                        | 0                                       |         |
| Nausea                             | 3                                        | 2                                       |         |
| Diarrhea                           | 3                                        | 1                                       |         |
| Dyspepsia                          | 3                                        | 0                                       |         |
| Dizziness                          | 0                                        | 4                                       |         |
| Serious adverse event <sup>b</sup> |                                          |                                         |         |
| Common cold                        | 3 (2.6)                                  | 2 (1.8)                                 | 1       |
| Urinary tract infection            | 1                                        | 0                                       |         |
| Dizziness                          | 1                                        | 2                                       |         |
| Ligament disorders                 | 0                                        | 0                                       |         |
| Myocardial infarction              | 1                                        | 0                                       |         |
| Adverse drug reaction <sup>c</sup> |                                          |                                         |         |
| Nausea                             | 6 (5.1)                                  | 4 (3.6)                                 | 0.749   |
| Diarrhea                           | 2                                        | 0                                       |         |
| Dyspepsia                          | 0                                        | 1                                       |         |
| Heartburn                          | 2                                        | 0                                       |         |
| Abdominal distress                 | 1                                        | 0                                       |         |
| Headache                           | 1                                        | 0                                       |         |
| Facial edema                       | 0                                        | 2                                       |         |
| Peripheral edema                   | 0                                        | 0                                       |         |
| Hypoglycemia                       | 0                                        | 2                                       |         |
| Itching                            | 0                                        | 0                                       |         |
| Insomnia                           | 1                                        | 0                                       |         |
| Pancreatitis                       | 0                                        | 0                                       |         |

Values are presented as number (%).

bid, twice daily; qd, once daily.

<sup>a</sup>Occurring in  $\geq 2\%$  of either treatment group, <sup>b</sup>The causal relationship between clinical medicine and serious adverse event is not estimated,

<sup>c</sup>The causal relationship between clinical medicine and adverse drug reaction is estimated.
